# Supplementary material for: Use of endoscopic ultrasound for pancreatic cancer from 2000 to 2016
Source: PubMed Central journal article supplement — Endosc Int Open. 2022 Jan 14;10(1):E19–29. doi: 10.1055/a-1608-0856 (PMC8759943; doi:10.1055/a-1608-0856), 2022-01-14
Supplement: 2408supmat_10-1055-a-1608-0856.pdf [file 2408supmat_10-1055-a-1608-0856.pdf]

## Supplementary material

Supplemental Table 1. Use of EUS over Time, stratified by sociodemographic and clinical variables

| Year                         | 2000 | 2001 | 2002 | 2003 | 2004 | 2005 | 2006 | 2007 | 2008 | 2009 | 2010 | 2011 | 2012 | 2013 | 2014 | 2015 |
|------------------------------|------|------|------|------|------|------|------|------|------|------|------|------|------|------|------|------|
| <b>EUS, total</b>            | 180  | 240  | 330  | 405  | 495  | 570  | 621  | 637  | 736  | 779  | 865  | 969  | 703  | 777  | 800  | 841  |
| <b>Total patients</b>        | 2440 | 2508 | 2629 | 2779 | 2814 | 2765 | 2778 | 2620 | 2617 | 2594 | 2626 | 2642 | 2508 | 2619 | 2630 | 2593 |
| <b>SOCIODEMOGRAPHIC DATA</b> |      |      |      |      |      |      |      |      |      |      |      |      |      |      |      |      |
| <b>Male EUS</b>              | 79   | 118  | 158  | 180  | 224  | 255  | 273  | 280  | 312  | 359  | 368  | 446  | 315  | 364  | 382  | 363  |
| <b>Total Males</b>           | 1042 | 1080 | 1092 | 1209 | 1217 | 1215 | 1190 | 1146 | 1123 | 1109 | 1119 | 1179 | 1077 | 1188 | 1211 | 1191 |
| <b>Female EUS</b>            | 101  | 122  | 172  | 225  | 271  | 315  | 348  | 357  | 424  | 420  | 497  | 523  | 388  | 413  | 418  | 478  |
| <b>Total Females</b>         | 1398 | 1428 | 1537 | 1570 | 1597 | 1550 | 1588 | 1474 | 1494 | 1485 | 1507 | 1463 | 1431 | 1431 | 1419 | 1402 |
| <b>Age 66-75 EUS</b>         | 106  | 145  | 200  | 228  | 265  | 288  | 319  | 308  | 351  | 392  | 413  | 469  | 307  | 373  | 331  | 399  |
| <b>Total Age 66-75</b>       | 1374 | 1409 | 1404 | 1544 | 1604 | 1572 | 1608 | 1556 | 1560 | 1508 | 1525 | 1534 | 1461 | 1462 | 1500 | 1394 |
| <b>Age 76+ EUS</b>           | 74   | 95   | 130  | 177  | 230  | 282  | 302  | 329  | 385  | 387  | 452  | 500  | 396  | 404  | 469  | 442  |
| <b>Total Age 76+</b>         | 1066 | 1099 | 1225 | 1235 | 1210 | 1193 | 1170 | 1064 | 1057 | 1085 | 1101 | 1108 | 1047 | 1157 | 1130 | 1199 |
| <b>Nonwhite EUS</b>          | 17   | 23   | 47   | 55   | 88   | 80   | 77   | 79   | 111  | 102  | 112  | 150  | 111  | 112  | 118  | 128  |
| <b>Total Nonwhite</b>        | 362  | 362  | 428  | 447  | 453  | 438  | 455  | 394  | 402  | 405  | 423  | 440  | 418  | 395  | 431  | 416  |
| <b>White EUS</b>             | 163  | 217  | 283  | 350  | 407  | 490  | 544  | 558  | 625  | 677  | 753  | 819  | 592  | 665  | 682  | 713  |
| <b>Total White</b>           | 2078 | 2146 | 2201 | 2332 | 2361 | 2327 | 2323 | 2226 | 2215 | 2189 | 2203 | 2202 | 2090 | 2224 | 2199 | 2177 |
| <b>Not Married EUS</b>       | 78   | 93   | 133  | 178  | 203  | 242  | 275  | 283  | 339  | 350  | 402  | 447  | 335  | 359  | 377  | 397  |
| <b>Total Not Married</b>     | 1276 | 1269 | 1398 | 1387 | 1434 | 1401 | 1436 | 1360 | 1338 | 1356 | 1378 | 1338 | 1285 | 1273 | 1327 | 1268 |
| <b>Married EUS</b>           | 102  | 147  | 197  | 227  | 292  | 328  | 346  | 354  | 397  | 429  | 463  | 522  | 368  | 418  | 423  | 444  |
| <b>Total Married</b>         | 1164 | 1239 | 1231 | 1392 | 1380 | 1364 | 1342 | 1260 | 1279 | 1238 | 1248 | 1304 | 1223 | 1346 | 1303 | 1325 |
| <b>Non-Metro EUS</b>         | 36   | 41   | 51   | 41   | 78   | 70   | 79   | 103  | 91   | 100  | 129  | 127  | 101  | 116  | 101  | 149  |
| <b>Total Non-Metro</b>       | 422  | 445  | 453  | 471  | 465  | 432  | 463  | 480  | 417  | 403  | 389  | 405  | 372  | 395  | 380  | 423  |
| <b>Metro EUS</b>             | 144  | 199  | 279  | 364  | 417  | 500  | 542  | 534  | 645  | 679  | 736  | 842  | 601  | 661  | 699  | 692  |
| <b>Total Metro</b>           | 2018 | 2063 | 2176 | 2308 | 2348 | 2333 | 2315 | 2140 | 2200 | 2190 | 2237 | 2237 | 2135 | 2224 | 2250 | 2170 |
| <b>Northeast EUS</b>         | 41   | 48   | 60   | 86   | 105  | 146  | 156  | 179  | 182  | 194  | 209  | 216  | 146  | 167  | 193  | 174  |
| <b>Total Northeast</b>       | 527  | 541  | 568  | 627  | 624  | 613  | 595  | 592  | 578  | 583  | 594  | 558  | 510  | 581  | 585  | 537  |
| <b>Southeast EUS</b>         | 32   | 43   | 82   | 66   | 99   | 107  | 108  | 139  | 120  | 143  | 167  | 191  | 157  | 174  | 157  | 196  |
| <b>Total Southeast</b>       | 599  | 643  | 712  | 721  | 734  | 730  | 673  | 655  | 627  | 626  | 591  | 632  | 592  | 613  | 617  | 625  |
| <b>Midwest EUS</b>           | 44   | 55   | 54   | 71   | 83   | 74   | 90   | 67   | 92   | 97   | 97   | 107  | 65   | 84   | 82   | 90   |
| <b>Total Midwest</b>         | 361  | 373  | 349  | 383  | 365  | 338  | 413  | 317  | 330  | 318  | 324  | 310  | 300  | 344  | 316  | 322  |
| <b>West Coast EUS</b>        | 63   | 94   | 134  | 182  | 208  | 243  | 267  | 252  | 342  | 345  | 392  | 455  | 335  | 352  | 368  | 381  |
| <b>Total West Coast</b>      | 953  | 951  | 1000 | 1048 | 1091 | 1084 | 1097 | 1056 | 1082 | 1067 | 1117 | 1142 | 1106 | 1081 | 1112 | 1109 |
| <b>High income zip EUS</b>   | 49   | 62   | 73   | 106  | 142  | 161  | 186  | 175  | 211  | 237  | 265  | 297  | 203  | 237  | 255  | 229  |
| <b>Total High income zip</b> | 525  | 542  | 577  | 644  | 675  | 640  | 663  | 644  | 643  | 649  | 656  | 698  | 659  | 711  | 743  | 668  |

## Supplementary material

| Year                            | 2000 | 2001 | 2002 | 2003 | 2004 | 2005 | 2006 | 2007 | 2008 | 2009 | 2010 | 2011 | 2012 | 2013 | 2014 | 2015 |
|---------------------------------|------|------|------|------|------|------|------|------|------|------|------|------|------|------|------|------|
| High education zip EUS          | 36   | 44   | 86   | 87   | 117  | 120  | 134  | 110  | 154  | 150  | 169  | 206  | 147  | 159  | 60   | 177  |
| Total High education zip        | 642  | 651  | 729  | 721  | 734  | 708  | 682  | 608  | 648  | 616  | 622  | 639  | 586  | 579  | 580  | 573  |
| <i>CLINICAL CHARACTERISTICS</i> |      |      |      |      |      |      |      |      |      |      |      |      |      |      |      |      |
| Locoregional and EUS            | 117  | 164  | 209  | 255  | 298  | 349  | 370  | 391  | 453  | 489  | 543  | 588  | 394  | 418  | 426  | 467  |
| Total Locoregional              | 853  | 846  | 924  | 1052 | 1031 | 1007 | 1030 | 998  | 1007 | 1033 | 1025 | 1075 | 1001 | 1013 | 1003 | 1026 |
| Distant and EUS                 | 46   | 49   | 88   | 120  | 165  | 190  | 212  | 200  | 238  | 248  | 288  | 330  | 275  | 327  | 335  | 339  |
| Total Distant                   | 1218 | 1293 | 1365 | 1383 | 1477 | 1483 | 1463 | 1338 | 1351 | 1318 | 1360 | 1327 | 1305 | 1440 | 1458 | 1419 |
| Charlson 0-1 EUS                | 144  | 193  | 271  | 325  | 387  | 424  | 454  | 362  | 422  | 432  | 492  | 534  | 440  | 474  | 478  | 523  |
| Total Charlson 0-1              | 1854 | 1842 | 1938 | 2080 | 2086 | 2015 | 1977 | 1482 | 1512 | 1469 | 1506 | 1456 | 1369 | 1395 | 1389 | 1480 |
| Charlson 2+ EUS                 | 30   | 39   | 48   | 69   | 93   | 123  | 152  | 124  | 148  | 164  | 190  | 187  | 199  | 209  | 228  | 215  |
| Total Charlson 2+               | 447  | 531  | 549  | 565  | 590  | 614  | 681  | 536  | 649  | 634  | 667  | 656  | 665  | 707  | 720  | 622  |
| Pancreatic Head EUS             | 125  | 152  | 222  | 279  | 356  | 410  | 401  | 414  | 480  | 508  | 594  | 625  | 461  | 486  | 495  | 520  |
| Total Pancreatic Head           | 1287 | 1296 | 1347 | 1486 | 1502 | 1419 | 1370 | 1297 | 1318 | 1322 | 1329 | 1313 | 1245 | 1285 | 1267 | 1299 |
| Pancreatic Body/Tail EUS        | 55   | 88   | 108  | 126  | 139  | 160  | 220  | 223  | 256  | 271  | 271  | 344  | 242  | 291  | 305  | 321  |
| Total Pancreatic Body/Tail      | 1153 | 1212 | 1282 | 1293 | 1312 | 1346 | 1408 | 1323 | 1299 | 1272 | 1297 | 1329 | 1263 | 1334 | 1363 | 1294 |
| ERCP and EUS                    | 126  | 185  | 221  | 271  | 321  | 386  | 379  | 361  | 446  | 470  | 506  | 543  | 417  | 453  | 439  | 432  |
| Total ERCP                      | 103  | 139  | 194  | 227  | 285  | 333  | 366  | 372  | 451  | 461  | 508  | 601  | 352  | 390  | 391  | 485  |
| Total Chemotherapy              | 889  | 946  | 981  | 1054 | 1101 | 1104 | 1093 | 1040 | 1111 | 1074 | 1076 | 1159 | 1090 | 1180 | 1166 | 1380 |
| Radiation and EUS               | 86   | 99   | 135  | 163  | 184  | 195  | 219  | 196  | 251  | 248  | 251  | 302  | 157  | 186  | 158  | 153  |

## Supplementary material

| Year            | 2000 | 2001 | 2002 | 2003 | 2004 | 2005 | 2006 | 2007 | 2008 | 2009 | 2010 | 2011 | 2012 | 2013 | 2014 | 2015 |
|-----------------|------|------|------|------|------|------|------|------|------|------|------|------|------|------|------|------|
| Total Radiation | 579  | 611  | 639  | 712  | 613  | 549  | 583  | 492  | 534  | 525  | 503  | 504  | 474  | 519  | 450  | 393  |
| Surgery and EUS | 42   | 68   | 76   | 77   | 106  | 126  | 148  | 133  | 146  | 192  | 204  | 230  | 86   | 116  | 112  | 114  |
| Total Surgery   | 249  | 262  | 275  | 296  | 307  | 322  | 348  | 297  | 322  | 343  | 365  | 383  | 316  | 370  | 355  | 338  |

EUS = endoscopic ultrasound

High income = zip code in highest 25<sup>th</sup> percentile of median incomes, by census data

High education = zip code in highest 25<sup>th</sup> percentile of median education attainment, by census data
